# Supplementary material for: Effect of Plant-Based Diets on Gut Microbiota: A Systematic Review of Interventional Studies
Source: MDPI journal article supplement (doi:10.3390/nu15061510), 2023-03-21
Supplement: s1 [file s1]

**Table S4.** Quality assessment of the intervention studies (n=9)

|                | <b>Peltonen et al., 1994 [14]</b> | <b>Peltonen et al., 1997 [15]</b> | <b>Zhang et al., 2018 [18]</b> | <b>Pagliai et al., 2019 [19]</b> | <b>Kahleova et al., 2020 [20]</b> | <b>Djekic et al., 2020 [21]</b> | <b>Kohnert et al., 2021 [23]</b> | <b>Toribio-Mateas et al., 2021 [24]</b> | <b>Kahleova et al., 2021 [25]</b> |
|----------------|-----------------------------------|-----------------------------------|--------------------------------|----------------------------------|-----------------------------------|---------------------------------|----------------------------------|-----------------------------------------|-----------------------------------|
| Q1             | Y                                 | Y                                 | N                              | Y                                | Y                                 | Y                               | Y                                | Y                                       | Y                                 |
| Q2             | NR                                | NR                                | NR                             | NR                               | Y                                 | NR                              | Y                                | Y                                       | Y                                 |
| Q3             | Y                                 | Y                                 | N                              | Y                                | Y                                 | N                               | Y                                | Y                                       | Y                                 |
| Q4             | Y                                 | Y                                 | N                              | N                                | N                                 | NR                              | N                                | Y                                       | N                                 |
| Q5             | Y                                 | Y                                 | N                              | NR                               | Y                                 | NR                              | NR                               | Y                                       | Y                                 |
| Q6             | N                                 | Y                                 | N                              | Y                                | N                                 | Y                               | Y                                | Y                                       | N                                 |
| Q7             | Y                                 | Y                                 | N                              | Y                                | N                                 | Y                               | Y                                | Y                                       | N                                 |
| Q8             | Y                                 | Y                                 | NR                             | Y                                | N                                 | Y                               | Y                                | Y                                       | N                                 |
| Q9             | Y                                 | Y                                 | Y                              | Y                                | N                                 | Y                               | Y                                | Y                                       | N                                 |
| Q10            | Y                                 | Y                                 | NR                             | NR                               | Y                                 | Y                               | Y                                | Y                                       | Y                                 |
| Q11            | Y                                 | Y                                 | Y                              | Y                                | Y                                 | Y                               | Y                                | Y                                       | Y                                 |
| Q12            | N                                 | N                                 | N                              | N                                | N                                 | N                               | N                                | N                                       | N                                 |
| Q13            | Y                                 | Y                                 | N                              | N                                | Y                                 | N                               | N                                | Y                                       | Y                                 |
| Q14            | Y                                 | Y                                 | Y                              | Y                                | Y                                 | N                               | Y                                | Y                                       | Y                                 |
| <b>Quality</b> | <b>Good</b>                       | <b>Good</b>                       | <b>Poor</b>                    | <b>Fair</b>                      | <b>Fair</b>                       | <b>Fair</b>                     | <b>Good</b>                      | <b>Good</b>                             | <b>Fair</b>                       |

The quality of included studies was assessed using the National Institutes of Health (NIH) Quality Assessment Tool for Intervention Studies [12]. Q, question; NR, not reported; N, no; Y, yes.

**Q 1.** Was the study described as randomized, a randomized trial, a randomized clinical trial, or an RCT? **Q 2.** Was the method of randomization adequate (i.e., use of randomly generated assignment)? **Q 3.** Was the treatment allocation concealed (so that assignments could not be predicted)? **Q 4.** Were study participants and providers blinded to treatment group assignment? **Q 5.** Were the people assessing the outcomes blinded to the participants' group assignments? **Q 6.** Were the groups similar at baseline on important characteristics that could affect outcomes (e.g., demographics, risk factors, co-morbid conditions)? **Q 7.** Was the overall drop-out rate from the study at endpoint 20% or lower of the number allocated to treatment? **Q 8.** Was the differential drop-out rate (between treatment groups) at endpoint 15 percentage points or lower? **Q 9.** Was there high adherence to the intervention protocols for each treatment group? **Q 10.** Were other interventions avoided or similar in the groups (e.g., similar background treatments)? **Q 11.** Were outcomes assessed using valid and reliable measures, implemented consistently across all study participants? **Q 12.** Did the authors report that the sample size was sufficiently large to be able to detect a difference in the main outcome between groups with at least 80% power? **Q 13.** Were outcomes reported or subgroups analyzed prespecified (i.e., identified before analyses were conducted)? **Q 14.** Were all randomized participants analyzed in the group to which they were originally assigned, i.e., did they use an intention-to-treat analysis?
