# Supplementary material for: Effect of Plant-Based Diets on Gut Microbiota: A Systematic Review of Interventional Studies
Source: MDPI journal article supplement (doi:10.3390/nu15061510), 2023-03-21
Supplement: s1 [file s1]

**Table S8.** The statistically reduced bacterial taxa in vegans, vegetarians and omnivores.

| Class       | Family              | Genus                        | Species                           | References                                                 |
|-------------|---------------------|------------------------------|-----------------------------------|------------------------------------------------------------|
| -           |                     | <i>Faecalibacterium</i>      | -                                 | Kohnert et al [23]                                         |
| -           |                     | <i>Ruminococcus</i>          | -                                 | Kohnert et al [23]                                         |
| -           | Enterobacteriaceae  | -                            | -                                 | Kim et al [17]                                             |
| -           | Barnesiellaceae     | -                            | -                                 | Ahrens et al [22]                                          |
| -           | Sutterellaceae      | -                            | -                                 | Ahrens et al [22]                                          |
| -           | Marinifilaceae      | -                            | -                                 | Ahrens et al [22]                                          |
| -           | Desulfovibrionaceae | -                            | -                                 | Ahrens et al [22]                                          |
| -           | Tannerellaceae      | <i>Parabacteroides</i>       | <i>Parabacteroides merdae</i>     | Ahrens et al [22], Djekic et al [21]                       |
| -           |                     | -                            | <i>Parabacteroides distasonis</i> | Ahrens et al [22]                                          |
| Bacteroidia | Rikenellaceae       | <i>Alistipes</i>             | <i>Alistipes putredinis</i>       | Ahrens et al [22]                                          |
| -           |                     | -                            | <i>Alistipes</i> sp. HGB5         | Zhang et al [18]                                           |
| -           |                     | -                            | <i>Alistipes shahii</i>           | Zhang et al [18]                                           |
| -           |                     | -                            | <i>Alistipes putredinis</i>       | Zhang et al [18]                                           |
| -           | Acidaminococcaceae  | <i>Phascolarctobacterium</i> | -                                 | Ahrens et al [22]                                          |
| Bacteroidia | Bacteroidaceae      | <i>Bacteroides</i>           | <i>Bacteroides caccae</i>         | Ahrens et al [22]; Kohnert et al [23]; Kahleova et al [25] |
| -           |                     | -                            | <i>Bacteroides vulgatus</i>       | Ahrens et al [22]                                          |
| -           | -                   | <i>Coprococcus</i>           | <i>Coprococcus comes</i>          | Ahrens et al [22]; Kohnert et al [23]                      |
| -           | -                   | -                            | <i>Bilophila wadsworthia</i>      | Ahrens et al [22]                                          |
| -           | -                   | -                            | <i>Blautia massiliensis</i>       | Ahrens et al [22]                                          |
| -           | -                   |                              | <i>Bacteroides fragilis</i>       | Kahleova et al [20], Kahleova et al [25]                   |
| -           | -                   | <i>Roseburia</i>             | -                                 | David et al [16]; Kohnert et al [23]                       |
| -           | -                   | -                            | <i>Eubacterium rectale</i>        | David et al [16]                                           |
| -           | -                   | -                            | <i>Ruminococcus bromii</i>        | David et al [16]                                           |
| -           | -                   | <i>Clostridium</i>           | -                                 | Djekic et al [21]; Kohnert et al [23]; Pagliai et al [19]  |
| -           | -                   | <i>Ruminiclostridium 5</i>   | -                                 | Djekic et al [21]                                          |

|   |   |                         |                                   |                    |
|---|---|-------------------------|-----------------------------------|--------------------|
| - | - | <i>Parasutterella</i>   | -                                 | Djekic et al [21]  |
| - | - | <i>Negativibacillus</i> | -                                 | Djekic et al [21]  |
| - | - | <i>Oscillospira</i>     | -                                 | Djekic et al [21]  |
| - | - | <i>Melainabacteria</i>  | -                                 | Djekic et al [21]  |
| - | - | <i>Akkermansia</i>      | -                                 | Kohnert et al [23] |
| - | - | <i>Bifidobacterium</i>  | -                                 | Kohnert et al [23] |
| - | - | <i>Odoribacter</i>      | -                                 | Pagliai et al [19] |
| - | - | -                       | <i>Streptococcus thermophilus</i> | Zhang et al [18]   |
