# Supplementary material for: Effect of Plant-Based Diets on Gut Microbiota: A Systematic Review of Interventional Studies
Source: MDPI journal article supplement (doi:10.3390/nu15061510), 2023-03-21
Supplement: s1 [file s1]

**Table S2.** Complete database search strategies

| EMBASE       |                                                                                                                                                                                                                                          |         |
|--------------|------------------------------------------------------------------------------------------------------------------------------------------------------------------------------------------------------------------------------------------|---------|
| #            | Keyword                                                                                                                                                                                                                                  | Results |
| 1            | exp Diet, Vegetarian/ or plant-based.mp.                                                                                                                                                                                                 | 12244   |
| 2            | vegetarian.mp. or exp Vegetarians/                                                                                                                                                                                                       | 8168    |
| 3            | vegan.mp. or exp Vegans/                                                                                                                                                                                                                 | 2141    |
| 4            | exp Gastrointestinal Microbiome/ or gut microbe.mp.                                                                                                                                                                                      | 74605   |
| 5            | probiotic.mp. or exp Probiotics/                                                                                                                                                                                                         | 47595   |
| 6            | prebiotic.mp. or exp Prebiotics/                                                                                                                                                                                                         | 13755   |
| 7            | intervention.mp.                                                                                                                                                                                                                         | 1106828 |
| 8            | 1 or 2 or 3                                                                                                                                                                                                                              | 15981   |
| 9            | 4 or 5 or 6                                                                                                                                                                                                                              | 116981  |
| 10           | 7 and 8 and 9                                                                                                                                                                                                                            | 75      |
| OVID MEDLINE |                                                                                                                                                                                                                                          |         |
| #            | Keyword                                                                                                                                                                                                                                  | Results |
| 1            | exp Diet, Vegetarian/ or plant-based.mp.                                                                                                                                                                                                 | 8123    |
| 2            | vegetarian.mp. or exp Vegetarians/                                                                                                                                                                                                       | 4843    |
| 3            | vegan.mp. or exp Vegans/                                                                                                                                                                                                                 | 1074    |
| 4            | exp Gastrointestinal Microbiome/ or gut microbe.mp.                                                                                                                                                                                      | 26693   |
| 5            | probiotic.mp. or exp Probiotics/                                                                                                                                                                                                         | 24033   |
| 6            | prebiotic.mp. or exp Prebiotics/                                                                                                                                                                                                         | 7196    |
| 7            | intervention.mp.                                                                                                                                                                                                                         | 603195  |
| 8            | 1 or 2 or 3                                                                                                                                                                                                                              | 9496    |
| 9            | 4 or 5 or 6                                                                                                                                                                                                                              | 51671   |
| 10           | 7 and 8 and 9                                                                                                                                                                                                                            | 29      |
| PUBMED       |                                                                                                                                                                                                                                          |         |
| #            | Keyword                                                                                                                                                                                                                                  | Results |
| 1            | Search: ((plant-based[Title/Abstract]) OR (vegetairan[Title/Abstract])) or (vegan[Title/Abstract/])                                                                                                                                      | 10304   |
| 2            | Search: ((gut micro*[Title/Abstact]) OR (probiotic*[Title/Abstact])) OR (prebiotic&[Title/Abstact])                                                                                                                                      | 68639   |
| 3            | Search: intervention[Title/Abstact]                                                                                                                                                                                                      | 693567  |
| 4            | Search: (((plant-based[Title/Abstract]) OR (vegetairan[Title/Abstract])) or (vegan[Title/Abstract/]) AND (((gut micro*[Title/Abstact]) OR (probiotic*[Title/Abstact])) OR (prebiotic&[Title/Abstact])) AND (intervention[Title/Abstact]) | 49      |
| SCOPUS       |                                                                                                                                                                                                                                          |         |
| #            | Keyword                                                                                                                                                                                                                                  | Results |
| 1            | (TITLE-ABS-KEY (plant-based) OR TITLE-ABS-KEY (vegetarian*) OR TITLE-ABS-KEY (vegan*))                                                                                                                                                   | 30609   |
| 2            | (TITLE-ABS-KEY (gut AND microb*) OR TITLE-ABS-KEY (probiotic*) OR TITLE-ABS-KEY (prebiotic*))                                                                                                                                            | 119964  |
| 3            | TITLE-ABS-KEY (intervention)                                                                                                                                                                                                             | 1555483 |
| 4            | ((TITLE-ABS-KEY (plant-based) OR TITLE-ABS-KEY (vegetarian*) OR TITLE-ABS-KEY (vegan*)) AND (TITLE-ABS-KEY (gut AND microb*) OR TITLE-ABS-KEY (probiotic*) OR TITLE-ABS-KEY (prebiotic*)) AND TITLE-ABS-KEY (intervention))              | 102     |
| 5            | ((TITLE-ABS-KEY (plant-based) OR TITLE-ABS-KEY (vegetarian*) OR TITLE-ABS-KEY (vegan*)) AND (TITLE-ABS-KEY (gut AND microb*) OR TITLE-ABS-KEY (probiotic*) OR TITLE-ABS-KEY                                                              | 50      |

|  |                                                                                |  |
|--|--------------------------------------------------------------------------------|--|
|  | (prebiotic*)) AND TITLE-ABS-KEY (intervention)) AND (LIMIT-TO (DOCTYPE, "ar")) |  |
|--|--------------------------------------------------------------------------------|--|
