# Supplementary material for: Effect of Plant-Based Diets on Gut Microbiota: A Systematic Review of Interventional Studies
Source: MDPI journal article supplement (doi:10.3390/nu15061510), 2023-03-21
Supplement: s1 [file s1]

**Table S7.** The statistically increased bacterial taxa in vegans, vegetarians and omnivores.

| Class      | Family                    | Genus                                | Species                                        | References                                                                    |
|------------|---------------------------|--------------------------------------|------------------------------------------------|-------------------------------------------------------------------------------|
| Clostridia | Lachnospiraceae           | <i>Roseburia</i>                     | <i>Roseburia hominis</i>                       | Ahrens et al [22]; Zhang et al [18]                                           |
| -          | -                         | -                                    | <i>Roseburia inulinivorans</i>                 | Zhang et al [18]                                                              |
| -          | -                         | -                                    | <i>Ruminococcus lactaris</i>                   | Zhang et al [18]                                                              |
| -          | -                         | <i>Lachnospiraceae</i> NK4A136 group | <i>Lachnospiraceae</i> NK4A136 group bacterium | Ahrens et al [22]                                                             |
| -          | -                         | <i>Anaerostipes</i>                  | <i>Anaerostipes hadrus</i>                     | Ahrens et al [22];Pagliai et al [19]                                          |
| -          | -                         | <i>Blautia</i>                       | <i>Blautia obeum</i>                           | Ahrens et al [22]                                                             |
| -          | -                         | -                                    | <i>Blautia faecis</i>                          | Ahrens et al [22]                                                             |
| Clostridia | Ruminococcaceae           | <i>Faecalibacterium</i>              | <i>Faecalibacterium prausnitzii</i>            | Ahrens et al [22];Kahleova et al [20]; Kohnert et al [23]; Toribio et al [24] |
| -          | -                         | <i>Subdoligranulum</i>               | -                                              | Ahrens et al [22]                                                             |
| -          | -                         | <i>Ruminococcus</i>                  | -                                              | Ahrens et al [22]; Kohnert et al [23]; Zhang et al [18]; Kahleova et al [25]  |
| -          | Monoglobaceae             | <i>Monoglobus</i>                    | -                                              | Ahrens et al [22]                                                             |
| -          | -                         | <i>Veillonella</i>                   | <i>Veillonella dispar</i>                      | Ahrens et al [22]                                                             |
| -          | -                         | -                                    | -                                              | Ahrens et al [22]                                                             |
| -          | Eggerthellaceae           | <i>Adlercreutzia</i>                 | <i>Adlercreutzia equolifaciens</i>             | Ahrens et al [22]                                                             |
| -          | Christensenellaceae       | <i>Christensenellaceae</i> R-7 group | -                                              | Ahrens et al [22]                                                             |
| -          | Butyricicoccaceae         | <i>Butyricoccus</i>                  | -                                              | Ahrens et al [22]                                                             |
| -          | Erysipelatoclostridiaceae | -                                    | -                                              | Ahrens et al [22]                                                             |
| -          | Enterobacteriaceae        | -                                    | -                                              | Ahrens et al [22]                                                             |
| -          | -                         | -                                    | <i>Bacteroides thetaiotaomicron</i>            | Ahrens et al [22]                                                             |
| -          | -                         | -                                    | <i>Dorea formicigenerans</i>                   | Ahrens et al [22]                                                             |
| -          | -                         | <i>Alistipes</i>                     | -                                              | David et al [16]; Kohnert et al [23]                                          |
| -          | -                         | <i>Bilophila</i>                     | -                                              | David et al [16]                                                              |

|             |                |                              |                                |                                                      |
|-------------|----------------|------------------------------|--------------------------------|------------------------------------------------------|
| Bacteroidia | -              | <i>Bacteroides</i>           | <i>Bacteroides fragilis</i>    | David et al [16]; Kim et al [17]; Kohnert et al [23] |
|             | -              | -                            | <i>Clostridium</i>             | Kim et al [17]                                       |
|             | -              | <i>Fusicatenibacter</i>      | -                              | Djekic et al [21]                                    |
|             | -              | <i>Shuttleworthia</i>        | -                              | Djekic et al [21]                                    |
|             | -              | <i>Akkermansia</i>           | -                              | Djekic et al [21]                                    |
|             | -              | <i>DTU089</i>                | -                              | Djekic et al [21]                                    |
|             | -              | <i>Anaerofilum</i>           | -                              | Djekic et al [21]                                    |
|             | -              | <i>Coprococcus</i>           | -                              | Kohnert et al [23]                                   |
|             | -              | <i>Dialister</i>             | -                              | Kohnert et al [23]                                   |
|             | -              | <i>Dorea</i>                 | -                              | Kohnert et al [23]                                   |
|             | -              | <i>Phascolarctobacterium</i> | -                              | Kohnert et al [23]                                   |
|             | -              | <i>Streptococcus</i>         | -                              | Pagliai et al [19]                                   |
|             | -              | -                            | <i>Lactobacillus plantarum</i> | Zhang et al [18]                                     |
|             | -              | -                            | <i>Proteus mirabilis</i>       | Zhang et al [18]                                     |
|             | Eubacteriaceae | <i>Eubacterium</i>           |                                | Kahveola et al [25]                                  |
