# Supplementary material for: Effect of Plant-Based Diets on Gut Microbiota: A Systematic Review of Interventional Studies
Source: Nutrients. 2023 Mar 21;15(6):1510. doi: 10.3390/nu15061510 (PMC10057430; doi:10.3390/nu15061510)
Supplement: Supplementary file 1 [file nutrients-15-01510-s001.zip]

Archive with 8 entries (8 files):
- Table S1 - PRISMA checklist.pdf
- Table S2 - Search strategy.pdf
- Table S3 -Extracted Information from eligible studies.xlsx
- Table S4 - Quality assesment intervention (NIH).pdf
- Table S5 - Quality assesment pre-post (NIH).pdf
- Table S6 - Quality assesment non-RCT (ROBINS-I).pdf
- Table S7 - Increased abundance of taxa.pdf
- Table S8 - Reduced abundance of taxa.pdf
