# Supplementary material for: Effect of Plant-Based Diets on Gut Microbiota: A Systematic Review of Interventional Studies
Source: Nutrients. 2023 Mar 21;15(6):1510. doi: 10.3390/nu15061510 (PMC10057430; doi:10.3390/nu15061510)
Supplement: Supplementary file 1 [file nutrients-15-01510-s001.zip › Table S3 -Extracted Information from eligible studies.xlsx]

## Sheet: Sheet1
Table S3. Extracted Information from eligible studies
Study	Study Design	Participants	Mean age (years)	Sample Size	Intervention duration	Intervention group	Comparison group	Main Findings (changes in gut microb)	Association with biomarkers
Peltonen et al. 1994 [14]	RCT	Adults with active rheumatoid arthritis	VD: 53 Omnivorous diet: 56	53 (8M + 45F)	13 months	7-10 days fast followed by a 3.5 months of vegan diet followed by a 9 months of lactovegetarian diet.	Omnivorous diet	Significant alteration in the intestinal flora was observed when the patients changed from omnivorous to a vegan diet. There was also a significant difference between the periods with vegan and lactovegetarian diets. The faecal flora from patients with HI and LI differed significantly from each other at 1 and 13 months during the diet.	In the diet group, a statistically significant difference in the GLC fatty acid profiles were observed between the baseline samples and the samples from other time points throughout the intervention period. No significant difference was observed in the control group at any time. Significant difference observed when the samples at 1 month (vegan period) were compared to those taken at 7, 10 and 13…
Peltonen et al 1997 [15]	RCT	Adults with rheumatoid arthritis	VD: 49.1 Omnivorous diet: 51.6	36 (34M + 2F)	1 month	Vegan diet	Omnivorous diet	Vegan diet changes the faecal flora in RA patients significantly, while there is no such change in the control group during the same period.	Vegan diet resulted in significant change in faecal microbial flora and induced a decrease in disease activity in some of the RA patients.
David et al. 2014 [16]	Non-randomized controlled trial	Healthy adults	Range: 21 - 33	10 (4F + 6M)	5 days	Plant-based	Animal-based	Animal-based diet had a greater impact on the gut microbiota than the plant-based diet. The animal-based diet increased the abundance of bile-tolerant microorganisms (Alistipes, Bilophila and Bacteroides) and decreased the levels of Firmicutes that metabolize dietary plant polysaccharides (Roseburia, Eubacterium rectale and Ruminococcus bromii).	Deoxycholic acid significantly increased on the animal-based diet. Total fecal bile acid concentrations also increase significantly on the animal-based diet, but do not change on the plant-based diet
Kim et al. 2023 [17]	Pre-post intervention	Obease adults with type 2 diabetes and/or hypertension	Mean = 61.6 (Range = 45 - 77)	6 (1M + 5F)	1 month	Non-lacto non-ovo Vegetarian Diet	None	A strict vegetarian diet (SVD) reduced theFirmicutes-to-Bacteroidetes ratio inthe gut microbiota, but did not alter enterotypes. An SVD led to a decrease in the pathobionts such as the Enterobacteriaceaeand an increase in commensa microbes such as Bacteroides fragilisandClostridiumspecies belonging to clusters XIVa and IV, resulting in reduced intestinal lipocalin-2 and short-chain fatty acids le…	A strict vegetarian diet (SVD) reduced body weight and the concentrations lof triglycerides, total cholesterol, low-density ipoproteinilipopro-tein cholesterol and haemoglobmproved fastingin A1c, and improvedfasting glucose and postprandial glucose levels.
Zhang et al. 2018 [18]	RCT	Healthy adults	n/a	29(15M + 14F)	3 months	Lacto-ovo-VD	Omnivorous diet	Roseburia and Ruminococcus increased after the short-term vegetarian diet and decrease after a short-term meat-rich diet. Several species belonging to the bile-tolerant Alistipes, which has previously been associated with a meat-rich diet, showed a lower abundance after the short-term vegetarian diet. Moreover, a short-term vegetarian diet increases L. plantarum and Streptococcus thermophiles, wh…	A long-term vegetarian diet was associated with a lower diversity of T-cell repertoire.The long-term vegetarians also had lower expression levels of IgE, a key immune index for allergy. BMI found to have no difference in the study and control groups.
Pagliai et al. 2020 [19]	Crossover RCT	Overweight adults with low-to-moderate risk for CVD	58.6 ± 9.8	23 (7M + 16F)	3 months	Lacto-ovo-VD	Mediteranean diet	MD significantly changed the abundance of Enterorhabdus, Lachnoclostridium and Parabacteroides, while VD significantly affected the abundance of Anaerostipes, Streptococcus, Clostridium sensu stricto, and Odoribacter.	No statistically signiﬁcant differences were reported in the pro-duction of SCFA for MD, while a reduction in propionic acid and an increase of both isobutyric and isovaleric acids emerged for VD. Correlation analyses showed a potential relationshipemodulated by the 2 diets ebetween changes of taxa and the vari-ations of clinical and biochemical parameters including the anthro-pometric parameters…
Kahleova et al. 2020 [20]	RCT	Overweight adults	25 - 75 Y/O. Intervention = 52.9 ± 11.7. Control = 57.5 ± 10.2	168 (25M + 143F)	4 months	Low-fat vegan diet. Vitamin B12 was supplemented (500 µg/day)	Omnivorous diet	Unchanged alpha-diversity & count of butyrate-producing bacteria. Insignificant increase in relative abundance of Bacteroidetes. No significant change in Firmicutes to Bacteroidetes ratio. Increase in relative abundance of Faecalibacterium prausnitzii. Lesser decrease in relative abundance of Bacteroides fragilis, as compared to omnivorous diet control group.	Body weight fell significantly via reduction in fat mass & visceral fat volume. Significant increase in PREDIcted M, insulin sensitivity index (PREDIM)
Djekic et al. 2020 [21]	Crossover RCT	Adults with history of IHD treated by PCI	Median = 67	31 (29M + 2F)	4 weeks	Isocaloric lacto-ovo-vegetarian diet	Isocaloric MD (daily intake of 145 g of red/white/processed meats)	Differences between vegetarian diet and meat diet were observed in the relative abundance of several microbe genera within the families Ruminococcaceae, Lachnospiraceae, and Akkermansiaceae.	VD participants showed lower mean TC, body weight, BMI compared with MD participants. No difference between diets was observed for other lipid profile indicators, BP, heart rate, QOL and number of participants achieving recommended guideline values of LDL, BP and BMI.
Ahrens et al. 2021 [22]	Pre-post intervention	Adults with hypertension	46.89 ± 12.38	73 (37M + 36F)	1 week	Immersion program of daily nutrition education, 3 daily meals of 100% whole food; plant-based foods (WFPB) with minimal sugar, salt, and oil, cardiopulmonary exercise and stress management classes	None	Significant increases in butyrate producers were detected, including Lachnospiraceae and Oscillospirales. Within-person, significant shifts in relative abundance (RA) occurred, e.g., increased Lachnospiraceae, Ruminococcaceae ), Faecalibacterium prausnitzii, and diversification and richness.	Minor but significant increases were observed for BMI and body weight. Significant decreases were observed for waist and hip circumferences, SBP, DBP, TC, TG, LDL and HDL.
Kohnert et al. 2021 [23]	RCT	Healthy adults	VD: 33.2 ± 11.2 MD: 29.9 ± 9.5	53 (33M + 20F)	4 weeks	Free choice strict vegan diet	Free choice meat-rich omnivorous diet ( >150g of meat per day)	Alpha diversity as well as beta diversity did not differ significantly between MD and VD. Plotting of baseline and end samples emphasized a highly intra-individual microbial composition. Overall, the gut microbiota was not remarkably altered between VD and MD after the trial. Coprococcus was found to be increased in VD while being decreased in MD. Roseburia and Faecalibacterium were increased in …	Strong associations between all clinical markers rare genus Odoribacter in vegan group, and with rare genus Clostridium in MD group. In vegans, all branched-chain amino acids (VAL, ILE, LEU) were negatively associated with Coprococcus and Dorea and correlated positively with Megamonas. In MD, branched-chain amino acids were negatively associated with Dorea.
Toribio-Mateas et al. 2021 [24]	RCT	Healthy adults	37.5 ± 8.9	39 (19M + 20F)	4 weeks	Replace a minimum of 4 animal-protein-based meals with a plant-based meal per week with PBMA ingredients given.	Omnivorous diet	A significant trend in the balances of the Lachnospira/Faecalibacterium and Ruminococcaceae/Oscillospira taxa were identified in the intervention group only, whereas no such behaviour was seen in the control group. A decrease in the Tenericutes phylum in the intervention group and an increase in the control group	No significant results were found in age, gender, BMI, and weight, separately in between groups
Kahleova et al. 2021 [25]	RCT	Overweight - Obease individuals	Range 30–76	62	16 weeks	Vegan diet	Mediteranean diet	The α-diversity decreased on both diets. The relative abundance of Bacteriodetes decreased and Eubacteria increased on both diets. The relative abundance of Bacteriodes fragilis decreased on the Mediterranean diet. The relative abundance of Lachnospiraceae, the Firmicutes to Bacteroidetes ratio increased and the butyrate-producing bacteria decreased on the Mediterranean diet. The relative abundan…	The participants lost 6.0 kg on the vegan diet on average, compared with no mean weight loss on the Mediterranean diet (between-group p < 0.001), most of the weight loss coming from the reduction in fat (see Table 2).
